# Supplementary material for: Comparison of Egg Yolk and Soybean Phospholipids on Hepatic Fatty Acid Profile and Liver Protection in Rats Fed a High-Fructose Diet
Source: MDPI journal article supplement (doi:10.3390/foods10071569), 2021-07-06
Supplement: s1 [file s1]

**Table S1** Main fatty acid compositions of egg yolk and soybean phospholipids (%)

|       | EPLs           | SPLs           |
|-------|----------------|----------------|
| C16:0 | 29.87 ± 0.20** | 15.46 ± 0.71   |
| C16:1 | 1.04 ± 0.03**  | 0.09 ± 0.01    |
| C18:0 | 15.44 ± 0.38** | 4.43 ± 0.11    |
| C18:1 | 26.43 ± 0.56** | 15.93 ± 0.20   |
| C18:2 | 15.14 ± 0.42   | 54.55 ± 0.06** |
| C20:0 | N.D.           | 0.24 ± 0.01    |
| C18:3 | 0.09 ± 0.03    | 6.36 ± 0.06**  |
| C22:0 | N.D.           | 0.46 ± 0.03    |
| C20:3 | 0.42 ± 0.03    | N.D.           |
| C20:4 | 6.52 ± 0.35    | N.D.           |

Note: N.D. means no detected; Data are presented as mean ± SEM (n=6). \* P<0.05. \*\* P<0.01, significant difference compared to SPLs determined by Student's t-test. EPLs represented the Egg yolk phospholipids and SPLs represented the soybean phospholipids.
